# Supplementary material for: Critical Care Services and 2009 H1N1 Influenza in Australia and New Zealand
Source: Atypon-hosted journal article supplement (doi:10.1056/nejmoa0908481), 2009-10-08
Supplement: nejm_anzic_1925sa1.pdf [file nejm_anzic_1925sa1.pdf]

## Supplementary Appendix

This appendix has been provided by the authors to give readers additional information about their work.

Supplement to: The ANZIC Influenza Investigators. Critical care services and 2009 H1N1 influenza in Australia and New Zealand. *N Engl J Med* 2009;361:1925-34. DOI: 10.1056/NEJMoa0908481.

Electronic Supplementary Material

Table ESM 1. Number of patients with other supportive treatments during intensive care (as of September 7, 2009)

|                           | N with data available (% of the total study population of 722) | N (% of patients with data available) |
|---------------------------|----------------------------------------------------------------|---------------------------------------|
| Vasopressor drugs         | 498 (69.0%)                                                    | 176 (35.3%)                           |
| Renal replacement therapy | 506 (70.1%)                                                    | 27 (5.3%)                             |
| Steroid therapy           | 494 (68.4%)                                                    | 91 (18.4%)                            |
